# Supplementary material for: Immunoinformatics-guided design of a multi-epitope vaccine based on the structural proteins of severe acute respiratory syndrome coronavirus 2
Source: Royal Society of Chemistry journal article supplement (doi:10.1039/d1ra02885e), 2021-01-01
Supplement: d1ra02885e1.pdf [file d1ra02885e1.pdf]

## Supplementary Materials

### Table Legends

**Table S1:** Predicted CTL epitopes of SARS-CoV-2 protein.

**Table S2:** Predicted HTL epitopes of SARS-CoV-2 protein.

**Table S3:** Predicted LBL epitopes of SARS-CoV-2 protein.

### Figure Legends

**Figure S1:** (A) Composition of the secondary structure from amino acid residues of vaccine construct, (B) Predicted secondary structure of vaccine construct by SOPMA server, (C) Predicted secondary structure of vaccine construct by PSIPRED server, and (D) Predicted cart of the vaccine construct by PSIPRED server.

**Table S1:** Predicted CTL epitopes of SARS-CoV-2 protein.

| <b>Epitope</b> | <b>Protein</b> | <b>Antigenicity</b>           | <b>Allergenicity</b>  | <b>Toxicity</b> |
|----------------|----------------|-------------------------------|-----------------------|-----------------|
| YANRNRFLY      | M              | 0.0256 (Probable NON-ANTIGEN) | Probable ALLERGEN     | Non-Toxin       |
| ATSRTLSTYY     | M              | 0.6108 (Probable ANTIGEN)     | Probable NON-ALLERGEN | Non-Toxin       |
| VATSRTLSTY     | M              | 0.9457 (Probable ANTIGEN)     | Probable ALLERGEN     | Non-Toxin       |
| WICLLQFAY      | M              | 0.7317 (Probable ANTIGEN)     | Probable ALLERGEN     | Toxin           |
| LVGLMWLSY      | M              | 1.0633 (Probable ANTIGEN)     | Probable NON-ALLERGEN | Non-Toxin       |
| YSRYRIGNY      | M              | 0.3996 (Probable NON-ANTIGEN) | Probable ALLERGEN     | Non-Toxin       |
| AGDSGFAAY      | M              | 0.9095 (Probable ANTIGEN)     | Probable NON-ALLERGEN | Non-Toxin       |
| SSDNIALLV      | M              | 0.3380 (Probable NON-ANTIGEN) | Probable ALLERGEN     | Non-Toxin       |
| SSSDNIALL      | M              | 0.3755 (Probable NON-ANTIGEN) | Probable ALLERGEN     | Non-Toxin       |
| LLEQWNLVI      | M              | 0.3649 (Probable NON-ANTIGEN) | Probable NON-ALLERGEN | Non-Toxin       |
| LVKPSFYVY      | E              | 0.4213 (Probable ANTIGEN)     | Probable ALLERGEN     | Non-Toxin       |
| LTARRLCAY      | E              | 0.7662 (Probable ANTIGEN)     | Probable ALLERGEN     | Non-Toxin       |
| VSLVKPSFY      | E              | 0.7476 (Probable ANTIGEN)     | Probable NON-ALLERGEN | Non-Toxin       |
| VSEETGTLI      | E              | 0.2570 (Probable NON-ANTIGEN) | Probable ALLERGEN     | Non-Toxin       |

**Table S2:** Predicted HTL epitopes of SARS-CoV-2 protein.

| Epitope          | Protein | Antigenicity                   | IL4         | IL10        | Allergenicity         | Toxicity  |
|------------------|---------|--------------------------------|-------------|-------------|-----------------------|-----------|
| LSYYKLGASQRVAGD  | M       | 0.2247 (Probable NON-ANTIGEN)  | Inducer     | Non-Inducer | Probable ALLERGEN     | Non-Toxin |
| RTLSTYYKLGASQRVA | M       | 0.5644 (Probable ANTIGEN)      | Inducer     | Non-Inducer | Probable ALLERGEN     | Non-Toxin |
| SRTLSTYYKLGASQRV | M       | 0.5526 (Probable ANTIGEN)      | Inducer     | Non-Inducer | Probable ALLERGEN     | Non-Toxin |
| TLSYYKLGASQRVAG  | M       | 0.4376 (Probable ANTIGEN)      | Inducer     | Non-Inducer | Probable ALLERGEN     | Non-Toxin |
| SYFIASFRLFARTRS  | M       | 0.3751 (Probable NON-ANTIGEN)  | Inducer     | Inducer     | Probable NON-ALLERGEN | Non-Toxin |
| YFIASFRLFARTRSM  | M       | 0.3975 (Probable NON-ANTIGEN)  | Inducer     | Non-Inducer | Probable NON-ALLERGEN | Non-Toxin |
| ASFRLFARTRSMWSF  | M       | 0.7304 (Probable ANTIGEN)      | Inducer     | Non-Inducer | Probable ALLERGEN     | Non-Toxin |
| FIASFRLFARTRSMW  | M       | 0.4072 (Probable ANTIGEN)      | Inducer     | Non-Inducer | Probable ALLERGEN     | Non-Toxin |
| IASRLFARTRSMWS   | M       | 0.4424 (Probable ANTIGEN)      | Inducer     | Non-Inducer | Probable ALLERGEN     | Non-Toxin |
| SYKLGASQRVAGDS   | M       | 0.0915 (Probable NON-ANTIGEN)  | Inducer     | Non-Inducer | Probable ALLERGEN     | Non-Toxin |
| ANRNRFlyIIKLIFL  | M       | 0.4812 (Probable ANTIGEN)      | Non-Inducer | Non-Inducer | Probable NON-ALLERGEN | Non-Toxin |
| NRFlyIIKLIFLWLL  | M       | 0.2109 (Probable NON-ANTIGEN)  | Non-Inducer | Inducer     | Probable NON-ALLERGEN | Non-Toxin |
| NRNRFlyIIKLIFLW  | M       | 0.3917 (Probable NON-ANTIGEN)  | Non-Inducer | Inducer     | Probable NON-ALLERGEN | Non-Toxin |
| RNRFlyIIKLIFLWL  | M       | 0.5114 (Probable ANTIGEN)      | Non-Inducer | Non-Inducer | Probable NON-ALLERGEN | Non-Toxin |
| YANRNRFlyIIKLIF  | M       | 0.3251 ( Probable NON-ANTIGEN) | Non-Inducer | Non-Inducer | Probable NON-ALLERGEN | Non-Toxin |
| LACFVLAAYRINWI   | M       | 1.2905 (Probable ANTIGEN)      | Inducer     | Non-Inducer | Probable NON-ALLERGEN | Non-Toxin |
| PVTLACFVLAAYRI   | M       | 0.8548 (Probable ANTIGEN)      | Inducer     | Non-Inducer | Probable NON-ALLERGEN | Non-Toxin |
| VTLACFVLAAYRIN   | M       | 1.0450 (Probable ANTIGEN)      | Inducer     | Non-Inducer | Probable NON-ALLERGEN | Non-Toxin |
| ACFVLAAYRINWIT   | M       | 1.1115 (Probable ANTIGEN)      | Inducer     | Non-Inducer | Probable NON-ALLERGEN | Non-Toxin |
| TLACFVLAAYRINW   | M       | 1.3132 (Probable ANTIGEN)      | Inducer     | Non-Inducer | Probable NON-ALLERGEN | Non-Toxin |
| LMWLSYFIASFRLF   | M       | 0.1022 ( Probable NON-ANTIGEN) | Inducer     | Non-Inducer | Probable NON-ALLERGEN | Non-Toxin |
| FRLFARTRSMWSFNP  | M       | 0.8873 (Probable ANTIGEN)      | Inducer     | Non-Inducer | Probable NON-ALLERGEN | Non-Toxin |
| RFLYIIKLIFLWLLW  | M       | 0.4833 (Probable ANTIGEN)      | Non-Inducer | Inducer     | Probable NON-ALLERGEN | Non-Toxin |
| SFRLFARTRSMWSFN  | M       | 0.7955 (Probable ANTIGEN)      | Inducer     | Non-Inducer | Probable NON-ALLERGEN | Non-Toxin |
| YKLGASQRVAGDSG   | M       | 0.2468 (Probable NON-ANTIGEN)  | Inducer     | Non-Inducer | Probable ALLERGEN     | Non-Toxin |
| FLYIIKLIFLWLLWP  | M       | 0.4200 (Probable ANTIGEN)      | Non-Inducer | Inducer     | Probable NON-ALLERGEN | Non-Toxin |

|                 |   |                                 |             |             |                       |           |
|-----------------|---|---------------------------------|-------------|-------------|-----------------------|-----------|
| GLMWLSYFIASFRLF | M | 0.0766 (Probable NON-ANTIGEN)   | Non-Inducer | Non-Inducer | Probable NON-ALLERGEN | Non-Toxin |
| LSYFIASFRLFARTR | M | 0.3427 (Probable NON-ANTIGEN)   | Inducer     | Inducer     | Probable NON-ALLERGEN | Non-Toxin |
| MWLSYFIASFRLFAR | M | 0.0043 ( Probable NON-ANTIGEN)  | Non-Inducer | Inducer     | Probable ALLERGEN     | Non-Toxin |
| LFARTRSMWSFNPET | M | 0.9033 (Probable ANTIGEN)       | Inducer     | Non-Inducer | Probable ALLERGEN     | Non-Toxin |
| RLFARTRSMWSFNPE | M | 0.7744 (Probable ANTIGEN)       | Inducer     | Non-Inducer | Probable ALLERGEN     | Non-Toxin |
| VGLMWLSYFIASFRL | M | 0.6658 (Probable ANTIGEN)       | Non-Inducer | Inducer     | Probable NON-ALLERGEN | Non-Toxin |
| AVILRGHLRIAGHHL | M | 0.1069 (Probable NON-ANTIGEN)   | Inducer     | Non-Inducer | Probable ALLERGEN     | Non-Toxin |
| ILRGHLRIAGHHLGR | M | -0.0989 ( Probable NON-ANTIGEN) | Inducer     | Non-Inducer | Probable NON-ALLERGEN | Non-Toxin |
| LRGHLRIAGHHLGRC | M | -0.1484 ( Probable NON-ANTIGEN) | Inducer     | Non-Inducer | Probable ALLERGEN     | Non-Toxin |
| LYIIKLIFLWLLWPV | M | 0.4288 (Probable ANTIGEN)       | Non-Inducer | Inducer     | Probable NON-ALLERGEN | Non-Toxin |
| VILRGHLRIAGHHLG | M | 0.0809 (Probable NON-ANTIGEN)   | Inducer     | Non-Inducer | Probable ALLERGEN     | Non-Toxin |
| KEITVATSRTLSYYK | M | 0.5731 (Probable ANTIGEN)       | Inducer     | Non-Inducer | Probable ALLERGEN     | Non-Toxin |
| PKEITVATSRTLSYY | M | 0.7003 (Probable ANTIGEN)       | Inducer     | Non-Inducer | Probable ALLERGEN     | Non-Toxin |
| LPKEITVATSRTLSY | M | 0.5400 (Probable ANTIGEN)       | Inducer     | Non-Inducer | Probable ALLERGEN     | Non-Toxin |
| WLSYFIASFRLFART | M | 0.0462 (Probable NON-ANTIGEN)   | Non-Inducer | Inducer     | Probable ALLERGEN     | Non-Toxin |
| DLPKEITVATSRTLS | M | 0.2410 (Probable NON-ANTIGEN)   | Inducer     | Non-Inducer | Probable ALLERGEN     | Non-Toxin |
| KDLPKEITVATSRTL | M | 0.1595 (Probable NON-ANTIGEN)   | Inducer     | Non-Inducer | Probable ALLERGEN     | Non-Toxin |
| EITVATSRTLSYYKL | M | 0.6002 (Probable ANTIGEN)       | Inducer     | Non-Inducer | Probable NON-ALLERGEN | Non-Toxin |
| ITVATSRTLSYYKLG | M | 0.8002 (Probable ANTIGEN)       | Inducer     | Non-Inducer | Probable NON-ALLERGEN | Non-Toxin |
| CFVLAAYRINWITG  | M | 1.0062 (Probable ANTIGEN)       | Inducer     | Non-Inducer | Probable NON-ALLERGEN | Non-Toxin |
| FLTWICLLQFAYANR | M | 0.7257 (Probable ANTIGEN)       | Non-Inducer | Non-Inducer | Probable NON-ALLERGEN | Toxin     |
| IGNYKLNTDHSSSSD | M | 0.2892 (Probable NON-ANTIGEN)   | Inducer     | Non-Inducer | Probable NON-ALLERGEN | Non-Toxin |
| RIGNYKLNTDHSSSS | M | 0.2362 (Probable NON-ANTIGEN)   | Inducer     | Non-Inducer | Probable ALLERGEN     | Non-Toxin |
| ETNILLNVPLHGTL  | M | -0.1998 (Probable NON-ANTIGEN)  | Non-Inducer | Inducer     | Probable NON-ALLERGEN | Non-Toxin |
| ESELVIGAVILRGHL | M | 0.5735 (Probable ANTIGEN)       | Inducer     | Inducer     | Probable ALLERGEN     | Non-Toxin |
| AGDSGFAAYSRYRIG | M | 0.9205 (Probable ANTIGEN)       | Inducer     | Non-Inducer | Probable ALLERGEN     | Non-Toxin |
| YKLNTDHSSSSDNIA | M | 0.0685 (Probable NON-ANTIGEN)   | Inducer     | Non-Inducer | Probable NON-ALLERGEN | Non-Toxin |
| VAGDSGFAAYSRYRI | M | 0.6745 (Probable ANTIGEN)       | Inducer     | Inducer     | Probable ALLERGEN     | Non-Toxin |

|                  |   |                                |             |             |                       |           |
|------------------|---|--------------------------------|-------------|-------------|-----------------------|-----------|
| SGFAAYSRYRIGNYK  | M | 0.5817 (Probable ANTIGEN)      | Inducer     | Non-Inducer | Probable NON-ALLERGEN | Non-Toxin |
| NLVIGFLFLTWICLL  | M | 1.2609 (Probable ANTIGEN)      | Non-Inducer | Inducer     | Probable NON-ALLERGEN | Non-Toxin |
| NILLNVPLHGILTR   | M | -0.0478 (Probable NON-ANTIGEN) | Non-Inducer | Inducer     | Probable NON-ALLERGEN | Non-Toxin |
| LAAVYRINWITGGIA  | M | 1.0581 (Probable ANTIGEN)      | Inducer     | Inducer     | Probable NON-ALLERGEN | Non-Toxin |
| DSGFAAYSRYRIGNY  | M | 0.8741 (Probable ANTIGEN)      | Inducer     | Inducer     | Probable ALLERGEN     | Non-Toxin |
| NWITGGIAIAMAACLV | M | 0.8988 (Probable ANTIGEN)      | Non-Inducer | Non-Inducer | Probable NON-ALLERGEN | Non-Toxin |
| LLEQWNLVIGFLFLT  | M | 0.8471 (Probable ANTIGEN)      | Non-Inducer | Inducer     | Probable NON-ALLERGEN | Non-Toxin |
| LEQWNLVIGFLFTW   | M | 1.0231 (Probable ANTIGEN)      | Non-Inducer | Inducer     | Probable NON-ALLERGEN | Non-Toxin |
| NYKLNTDHSSSDNI   | M | 0.1970 (Probable NON-ANTIGEN)  | Inducer     | Non-Inducer | Probable NON-ALLERGEN | Non-Toxin |
| EQWNLVIGFLFTWI   | M | 1.0549 (Probable ANTIGEN)      | Non-Inducer | Non-Inducer | Probable NON-ALLERGEN | Non-Toxin |
| PLLESELVIGAVILR  | M | 0.7261 (Probable ANTIGEN)      | Non-Inducer | Inducer     | Probable NON-ALLERGEN | Non-Toxin |
| SELVIGAVILRGHLR  | M | 0.6768 (Probable ANTIGEN)      | Inducer     | Non-Inducer | Probable NON-ALLERGEN | Non-Toxin |
| GDSGFAAYSRYRIGN  | M | 0.8900 (Probable ANTIGEN)      | Inducer     | Non-Inducer | Probable ALLERGEN     | Non-Toxin |
| IFLWLLWPVTLACFV  | M | 0.6358 (Probable ANTIGEN)      | Non-Inducer | Inducer     | Probable NON-ALLERGEN | Non-Toxin |
| LESELVIGAVILRGH  | M | 0.6528 (Probable ANTIGEN)      | Inducer     | Inducer     | Probable ALLERGEN     | Non-Toxin |
| LLESELVIGAVILRG  | M | 0.5636 (Probable ANTIGEN)      | Non-Inducer | Inducer     | Probable NON-ALLERGEN | Non-Toxin |
| YIIKLIFLWLLWPVT  | M | 0.4298 (Probable ANTIGEN)      | Non-Inducer | Inducer     | Probable NON-ALLERGEN | Non-Toxin |
| YKLGASQRVAGDSGF  | M | 0.3250 (Probable NON-ANTIGEN)  | Inducer     | Non-Inducer | Probable ALLERGEN     | Non-Toxin |
| YRIGNYKLNTDHSS   | M | 0.1572 (Probable NON-ANTIGEN)  | Inducer     | Non-Inducer | Probable ALLERGEN     | Non-Toxin |
| LVIGFLFLTWICLLQ  | M | 1.0776 (Probable ANTIGEN)      | Non-Inducer | Inducer     | Probable NON-ALLERGEN | Toxin     |
| FAAYSRYRIGNYKLN  | M | 0.6185 (Probable ANTIGEN)      | Inducer     | Non-Inducer | Probable ALLERGEN     | Non-Toxin |
| GFAAYSRYRIGNYKL  | M | 0.6317 (Probable ANTIGEN)      | Inducer     | Non-Inducer | Probable NON-ALLERGEN | Non-Toxin |
| VIGAVILRGHLRIAG  | M | 0.4903 (Probable ANTIGEN)      | Inducer     | Non-Inducer | Probable NON-ALLERGEN | Non-Toxin |
| RGHLRIAGHHLGRCD  | M | 0.0223 (Probable NON-ANTIGEN)  | Inducer     | Non-Inducer | Probable ALLERGEN     | Non-Toxin |
| LVTLAILTARRLCAY  | E | 0.8304 (Probable ANTIGEN)      | Non-Inducer | Inducer     | Probable NON-ALLERGEN | Non-Toxin |
| LLVTLAILTARRLCA  | E | 0.8706 (Probable ANTIGEN)      | Non-Inducer | Inducer     | Probable NON-ALLERGEN | Non-Toxin |

|                 |   |                               |             |             |                       |           |
|-----------------|---|-------------------------------|-------------|-------------|-----------------------|-----------|
| VTLAILTARRLCAYC | E | 1.2832 (Probable ANTIGEN)     | Non-Inducer | Non-Inducer | Probable NON-ALLERGEN | Non-Toxin |
| TLAILTARRLCAYCC | E | 1.1538 (Probable ANTIGEN)     | Non-Inducer | Inducer     | Probable NON-ALLERGEN | Toxin     |
| FLLVTLAILTARRLC | E | 1.1123 (Probable ANTIGEN)     | Non-Inducer | Inducer     | Probable NON-ALLERGEN | Non-Toxin |
| FYVYSRVKLNLSRV  | E | 0.6103 (Probable ANTIGEN)     | Inducer     | Inducer     | Probable NON-ALLERGEN | Non-Toxin |
| IVNSVLLFLAFVVFL | E | 0.2731 (Probable NON-ANTIGEN) | Non-Inducer | Inducer     | Probable NON-ALLERGEN | Non-Toxin |
| LIVNSVLLFLAFVVF | E | 0.2925 (Probable NON-ANTIGEN) | Non-Inducer | Inducer     | Probable NON-ALLERGEN | Non-Toxin |
| NSVLLFLAFVVFLLV | E | 0.4220 (Probable ANTIGEN)     | Non-Inducer | Inducer     | Probable NON-ALLERGEN | Non-Toxin |
| SVLLFLAFVVFLLV  | E | 0.5446 (Probable ANTIGEN)     | Non-Inducer | Inducer     | Probable NON-ALLERGEN | Non-Toxin |
| TLIVNSVLLFLAFVV | E | 0.2903 (Probable NON-ANTIGEN) | Non-Inducer | Inducer     | Probable NON-ALLERGEN | Non-Toxin |
| VLLFLAFVVFLLVTL | E | 0.6386 (Probable ANTIGEN)     | Non-Inducer | Inducer     | Probable NON-ALLERGEN | Non-Toxin |
| VNSVLLFLAFVVFL  | E | 0.3985 (Probable NON-ANTIGEN) | Non-Inducer | Inducer     | Probable NON-ALLERGEN | Non-Toxin |
| YVYSRVKLNLSRV   | E | 0.4492 (Probable ANTIGEN)     | Inducer     | Inducer     | Probable NON-ALLERGEN | Non-Toxin |
| VFLLVTLAILTARRL | E | 0.8883 (Probable ANTIGEN)     | Non-Inducer | Inducer     | Probable NON-ALLERGEN | Non-Toxin |
| PSFYVYSRVKLNLS  | E | 0.7986 (Probable ANTIGEN)     | Inducer     | Inducer     | Probable NON-ALLERGEN | Non-Toxin |
| SFYVYSRVKLNLSR  | E | 0.6291 (Probable ANTIGEN)     | Inducer     | Inducer     | Probable NON-ALLERGEN | Non-Toxin |
| IVNVSLVKPSFYVYS | E | 0.6373 (Probable ANTIGEN)     | Non-Inducer | Inducer     | Probable ALLERGEN     | Non-Toxin |
| NIVNVSLVKPSFYVY | E | 0.7680 (Probable ANTIGEN)     | Inducer     | Inducer     | Probable ALLERGEN     | Non-Toxin |
| VNVSLVKPSFYVYSR | E | 0.7513 (Probable ANTIGEN)     | Inducer     | Inducer     | Probable ALLERGEN     | Non-Toxin |
| KPSFYVYSRVKLNLS | E | 0.8229 (Probable ANTIGEN)     | Inducer     | Inducer     | Probable NON-ALLERGEN | Non-Toxin |

|                  |   |                               |             |             |                       |           |
|------------------|---|-------------------------------|-------------|-------------|-----------------------|-----------|
| AFVVFLVTLAILTA   | E | 0.6299 (Probable ANTIGEN)     | Non-Inducer | Inducer     | Probable NON-ALLERGEN | Non-Toxin |
| FLAFVVFLVTLAIL   | E | 0.7476 (Probable ANTIGEN)     | Non-Inducer | Inducer     | Probable NON-ALLERGEN | Non-Toxin |
| FVVFLVTLAILTAR   | E | 0.8896 (Probable ANTIGEN)     | Non-Inducer | Inducer     | Probable NON-ALLERGEN | Non-Toxin |
| LAILTARRLCAYCCN  | E | 1.1242 (Probable ANTIGEN)     | Non-Inducer | Non-Inducer | Probable NON-ALLERGEN | Toxin     |
| VVFLVTLAILTARR   | E | 1.0949 (Probable ANTIGEN)     | Non-Inducer | Inducer     | Probable NON-ALLERGEN | Non-Toxin |
| NVSLVKPSFYVYSRV  | E | 0.6449 (Probable ANTIGEN)     | Inducer     | Inducer     | Probable NON-ALLERGEN | Non-Toxin |
| LAFVVFLVTLAILT   | E | 0.8229 (Probable ANTIGEN)     | Non-Inducer | Inducer     | Probable NON-ALLERGEN | Non-Toxin |
| LFLAFVVFLVTLAI   | E | 0.7471 (Probable ANTIGEN)     | Non-Inducer | Inducer     | Probable NON-ALLERGEN | Non-Toxin |
| LLFLAFVVFLVTLA   | E | 0.8122 (Probable ANTIGEN)     | Non-Inducer | Inducer     | Probable NON-ALLERGEN | Non-Toxin |
| YSRVKNLNSSRV PDL | E | 0.7705 (Probable ANTIGEN)     | Inducer     | Inducer     | Probable NON-ALLERGEN | Non-Toxin |
| VYSRVKNLNSSRV PD | E | 0.5993 (Probable ANTIGEN)     | Inducer     | Inducer     | Probable ALLERGEN     | Non-Toxin |
| EETGLIVNSVLLFL   | E | 0.2055 (Probable NON-ANTIGEN) | Non-Inducer | Inducer     | Probable ALLERGEN     | Non-Toxin |
| VSLVKPSFYVYSRVK  | E | 0.7974 (Probable ANTIGEN)     | Inducer     | Inducer     | Probable NON-ALLERGEN | Non-Toxin |
| LVKPSFYVYSRVKNL  | E | 0.7311 (Probable ANTIGEN)     | Inducer     | Inducer     | Probable NON-ALLERGEN | Non-Toxin |
| VKPSFYVYSRVKNLN  | E | 1.2319 (Probable ANTIGEN)     | Inducer     | Inducer     | Probable NON-ALLERGEN | Non-Toxin |
| ETGLIVNSVLLFLA   | E | 0.2236 (Probable NON-ANTIGEN) | Non-Inducer | Inducer     | Probable NON-ALLERGEN | Non-Toxin |
| SEETGLIVNSVLLF   | E | 0.1882 (Probable NON-ANTIGEN) | Inducer     | Inducer     | Probable NON-ALLERGEN | Non-Toxin |
| TGLIVNSVLLFLAF   | E | 0.3354 (Probable NON-ANTIGEN) | Non-Inducer | Inducer     | Probable NON-ALLERGEN | Non-Toxin |
| SRVKNLNSSRV PDL  | E | 0.7404 (Probable ANTIGEN)     | Inducer     | Inducer     | Probable ALLERGEN     | Non-Toxin |

|                 |   |                                |             |             |                       |           |
|-----------------|---|--------------------------------|-------------|-------------|-----------------------|-----------|
| MYSFVSEETGTLIVN | E | 0.2951 (Probable NON-ANTIGEN)  | Inducer     | Inducer     | Probable NON-ALLERGEN | Non-Toxin |
| GTLIVNSVLLFLAFV | E | 0.3383 (Probable NON-ANTIGEN)  | Non-Inducer | Inducer     | Probable NON-ALLERGEN | Non-Toxin |
| CNIVNVSLVKPSFYV | E | 0.8081 (Probable ANTIGEN)      | Inducer     | Inducer     | Probable ALLERGEN     | Non-Toxin |
| YSFVSEETGTLIVNS | E | 0.3987 (Probable NON-ANTIGEN)  | Inducer     | Inducer     | Probable ALLERGEN     | Non-Toxin |
| CCNIVNVSLVKPSFY | E | 0.8879 (Probable ANTIGEN)      | Inducer     | Inducer     | Probable NON-ALLERGEN | Toxin     |
| SLVKPSFYVYSRVKN | E | 0.6514 (Probable ANTIGEN)      | Inducer     | Inducer     | Probable NON-ALLERGEN | Non-Toxin |
| AILTARRLCAYCCNI | E | 1.1273 (Probable ANTIGEN)      | Non-Inducer | Inducer     | Probable NON-ALLERGEN | Toxin     |
| RRLCAYCCNIVNVSL | E | 1.1971 (Probable ANTIGEN)      | Non-Inducer | Inducer     | Probable NON-ALLERGEN | Toxin     |
| ILTARRLCAYCCNIV | E | 1.0817 (Probable ANTIGEN)      | Non-Inducer | Inducer     | Probable NON-ALLERGEN | Toxin     |
| YCCNIVNVSLVKPSF | E | 0.9396 (Probable ANTIGEN)      | Inducer     | Non-Inducer | Probable NON-ALLERGEN | Toxin     |
| RLCAYCCNIVNVSLV | E | 1.2823 (Probable ANTIGEN)      | Non-Inducer | Inducer     | Probable NON-ALLERGEN | Toxin     |
| RVKNLNSSRVPDLLV | E | 0.7925 (Probable ANTIGEN)      | Inducer     | Inducer     | Probable ALLERGEN     | Non-Toxin |
| VSEETGTLIVNSVLL | E | 0.1951 (Probable NON-ANTIGEN)  | Inducer     | Inducer     | Probable NON-ALLERGEN | Non-Toxin |
| SFVSEETGTLIVNSV | E | 0.3658 ( Probable NON-ANTIGEN) | Inducer     | Inducer     | Probable NON-ALLERGEN | Non-Toxin |
| ARRLCAYCCNIVNVS | E | 1.0866 (Probable ANTIGEN)      | Non-Inducer | Non-Inducer | Probable ALLERGEN     | Toxin     |
| AYCCNIVNVSLVKPS | E | 0.8053 (Probable ANTIGEN)      | Inducer     | Non-Inducer | Probable NON-ALLERGEN | Toxin     |
| LCAYCCNIVNVSLVK | E | 0.8552 (Probable ANTIGEN)      | Inducer     | Non-Inducer | Probable NON-ALLERGEN | Toxin     |
| LTARRLCAYCCNIVN | E | 1.1125 (Probable ANTIGEN)      | Non-Inducer | Non-Inducer | Probable NON-ALLERGEN | Toxin     |
| TARRLCAYCCNIVNV | E | 0.9984 (Probable ANTIGEN)      | Non-Inducer | Non-Inducer | Probable NON-ALLERGEN | Toxin     |



|                 |   |                               |         |             |                       |           |
|-----------------|---|-------------------------------|---------|-------------|-----------------------|-----------|
| CAYCCNIVNVSLVKP | E | 0.8337 (Probable ANTIGEN)     | Inducer | Non-Inducer | Probable NON-ALLERGEN | Toxin     |
| FVSEETGTLIVNSVL | E | 0.1704 (Probable NON-ANTIGEN) | Inducer | Inducer     | Probable NON-ALLERGEN | Non-Toxin |

---

**Table S3:** Predicted LBL epitopes of SARS-CoV-2 protein.

| <b>Epitope</b>    | <b>Protein</b> | <b>Allergenicity</b>            | <b>Allergenicity</b>  | <b>Toxicity</b> |
|-------------------|----------------|---------------------------------|-----------------------|-----------------|
| RSMWSFNPETNILLNV  | M              | 0.4451 (Probable ANTIGEN)       | Probable NON-ALLERGEN | Non-Toxin       |
| SFRLFARTRSMWSFNP  | M              | 0.9510 (Probable ANTIGEN)       | Probable NON-ALLERGEN | Non-Toxin       |
| RFLYIIKLIFLWLLWP  | M              | 0.4532 (Probable ANTIGEN)       | Probable NON-ALLERGEN | Non-Toxin       |
| GDSGFAAYSRYRIGNY  | M              | 0.8980 (Probable ANTIGEN)       | Probable ALLERGEN     | Non-Toxin       |
| HGTILTRPILLESEVI  | M              | 0.2197 ( Probable NON-ANTIGEN)  | Probable NON-ALLERGEN | Non-Toxin       |
| RCDIKDLPKEITVATS  | M              | 0.5606 (Probable ANTIGEN )      | Probable ALLERGEN     | Non-Toxin       |
| RGHLRIAGHHLGRCDI  | M              | 0.0530 (Probable NON-ANTIGEN)   | Probable ALLERGEN     | Non-Toxin       |
| RINWITGGIAIAMAACL | M              | 1.2392 (Probable ANTIGEN)       | Probable NON-ALLERGEN | Non-Toxin       |
| PKEITVATSRTLSSYYK | M              | 0.5935 (Probable ANTIGEN)       | Probable NON-ALLERGEN | Non-Toxin       |
| GIAIAMAACLVGLMWLS | M              | 0.9132 (Probable ANTIGEN)       | Probable NON-ALLERGEN | Non-Toxin       |
| LVIGFLFTWICLLQF   | M              | 0.9967 (Probable ANTIGEN)       | Probable NON-ALLERGEN | Toxin           |
| ACFVLAAYRINWITG   | M              | 0.9714 (Probable ANTIGEN)       | Probable NON-ALLERGEN | Non-Toxin       |
| RYRIGNYKLNTDHSSS  | M              | 0.0786 (Probable NON-ANTIGEN)   | Probable ALLERGEN     | Non-Toxin       |
| TVEELKKLLEQWNLVI  | M              | -0.0964 ( Probable NON-ANTIGEN) | Probable ALLERGEN     | Non-Toxin       |
| SYKLGASQRVAGDSG   | M              | 0.2129 (Probable NON-ANTIGEN)   | Probable NON-ALLERGEN | Non-Toxin       |
| DSNGTITVEELKKLLE  | M              | 0.0790 (Probable NON-ANTIGEN)   | Probable ALLERGEN     | Non-Toxin       |
| YKLNTDHSSSDNIAL   | M              | 0.1815 (Probable NON-ANTIGEN)   | Probable NON-ALLERGEN | Non-Toxin       |

---

|                  |   |                                |                       |           |
|------------------|---|--------------------------------|-----------------------|-----------|
| ACLVGLMWLSYFIASF | M | 0.4075 (Probable ANTIGEN)      | Probable NON-ALLERGEN | Non-Toxin |
| LTWICLLQFAYANRNR | M | 1.1530 (Probable ANTIGEN)      | Probable NON-ALLERGEN | Non-Toxin |
| LWPVTLACFVLAAYR  | M | 0.8961 (Probable ANTIGEN)      | Probable NON-ALLERGEN | Non-Toxin |
| MWLSYFIASFRLFART | M | 0.0488 (Probable NON-ANTIGEN)  | Probable ALLERGEN     | Non-Toxin |
| PETNILLNVPLHGIL  | M | -0.2635 (Probable NON-ANTIGEN) | Probable ALLERGEN     | Non-Toxin |
| QFAYANRNRFLYIIKL | M | 0.7140 (Probable ANTIGEN)      | Probable ALLERGEN     | Non-Toxin |
| TLAILTARRLCAYCCN | E | 1.0519 (Probable ANTIGEN)      | Probable NON-ALLERGEN | Toxin     |
| NVSLVKPSFYVYSRVK | E | 0.7865 (Probable ANTIGEN)      | Probable NON-ALLERGEN | Non-Toxin |
| YVYSRVKLNLSRVDP  | E | 0.5457 (Probable ANTIGEN)      | Probable NON-ALLERGEN | Non-Toxin |
| LCAYCCNIVNVSLVKP | E | 0.7286 (Probable ANTIGEN)      | Probable NON-ALLERGEN | Toxin     |
| FVSEETGTLIVNSVLL | E | 0.2099 (Probable NON-ANTIGEN)  | Probable NON-ALLERGEN | Non-Toxin |

---

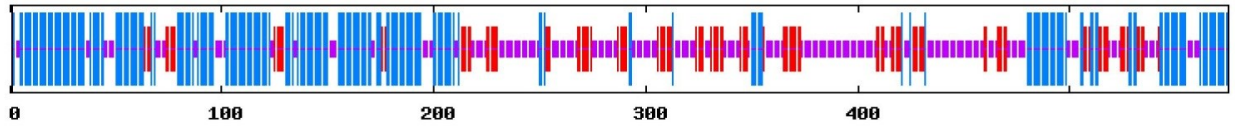

(A)

Sequence length : 575

---

SOPMA :

|                       |      |   |     |    |        |
|-----------------------|------|---|-----|----|--------|
| Alpha helix           | (Hh) | : | 230 | is | 40.00% |
| 3 <sub>10</sub> helix | (Gg) | : | 0   | is | 0.00%  |
| Pi helix              | (Ii) | : | 0   | is | 0.00%  |
| Beta bridge           | (Bb) | : | 0   | is | 0.00%  |
| Extended strand       | (Ee) | : | 111 | is | 19.30% |
| Beta turn             | (Tt) | : | 0   | is | 0.00%  |
| Bend region           | (Ss) | : | 0   | is | 0.00%  |
| Random coil           | (Cc) | : | 234 | is | 40.70% |
| Ambiguous states (?)  | :    | : | 0   | is | 0.00%  |
| Other states          | :    | : | 0   | is | 0.00%  |

(B)

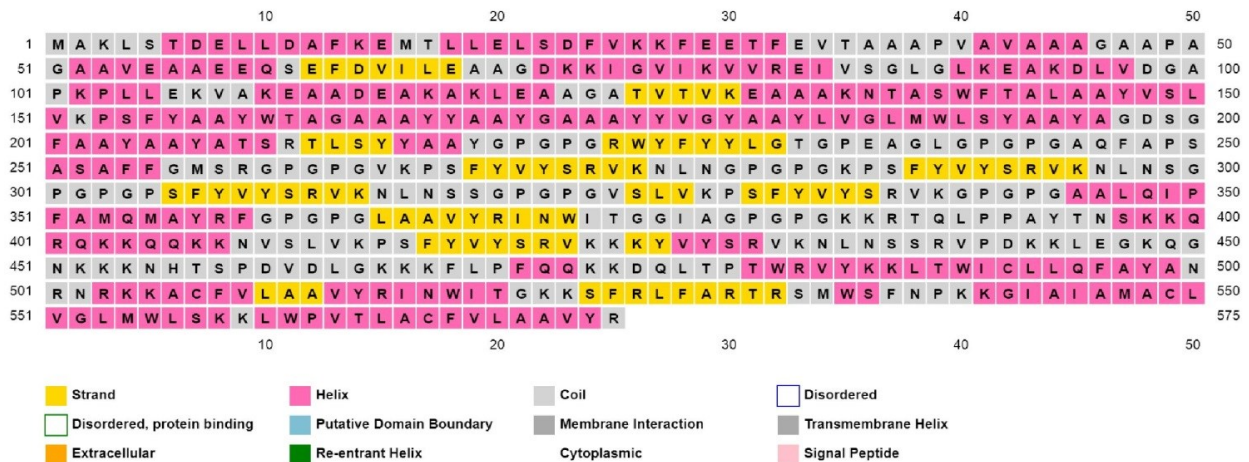

(C)

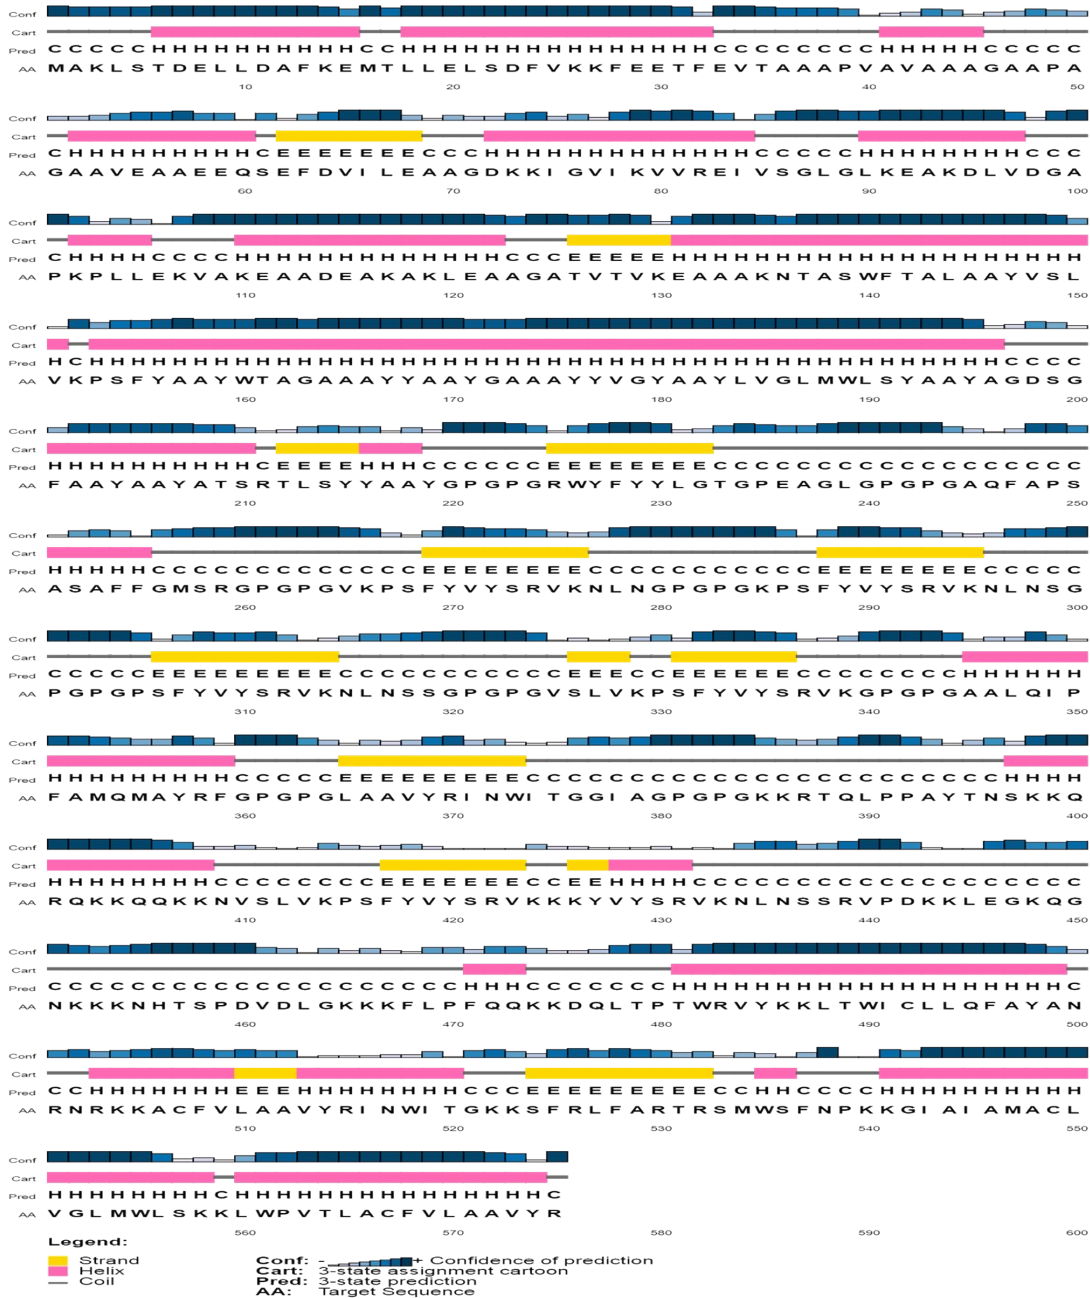

(D)

**Figure S1:** (A) Composition of the secondary structure from amino acid residues of vaccine construct, (B) Predicted secondary structure of vaccine construct by SOPMA server, (C) Predicted secondary structure of vaccine construct by PSIPRED server, and (D) Predicted cart of the vaccine construct by PSIPRED server.
